# Supplementary material for: Unravelling the future role of internal variability in South Asian near-surface wind speed
Source: Copernicus journal article supplement (doi:10.5194/egusphere-2025-1156), 2025-05-06
Supplement: Supplementary file 1 [file egusphere-2025-1156-supplement.pdf]

# Supporting Information for

## **Unravelling the future role of internal variability in South Asian near-surface wind speed**

Cheng Shen<sup>1</sup>, Hui-Shuang Yuan<sup>2</sup>, Zhi-Bo Li<sup>1</sup>, Jinling Piao<sup>3, 4</sup>, Youli Chang<sup>2</sup>, Deliang Chen<sup>1, 5, \*</sup>

<sup>1</sup> Regional Climate Group, Department of Earth Sciences, University of Gothenburg, Gothenburg, Sweden

<sup>2</sup> Department of Atmospheric Science, Yunnan University, Kunming, China

<sup>3</sup> Center for Monsoon System Research, Institute of Atmospheric Physics, Chinese Academy of Sciences, Beijing, China

<sup>4</sup> College of Earth and Planetary Sciences, University of Chinese Academy of Sciences, Beijing, China

<sup>5</sup> Department of Earth System Science, Tsinghua University, Beijing, China

*Correspondence to:* Deliang Chen (deliang@gvc.gu.se)

### **Contents of this file**

Figure S1

**A assumption:**

NSWS can be divide into **IPO-related NSWS component** and **IPO-independent NSWS component**

$$NSWS(i, t) = r(i)_{NSWS, IPO} \times IPO(i, t) + NSWS_{non-IPO}(i, t)$$

what we need:

$$NSWS_{non-IPO}(i, t) = NSWS(i, t) - r(i)_{NSWS, IPO} \times IPO(i, t)$$

Remove the NSWS component that is linearly associated with IPO index

$$r(i)_{NSWS, IPO} = \frac{\partial NSWS(i, t)}{\partial IPO(i, t)}$$

**Equation used to calculate:**

$$NSWS_{non-IPO}(i, t) = NSWS(i, t) - \frac{\partial NSWS(i, t)}{\partial IPO(i, t)} \times IPO(i, t)$$

17

18

**Figure S1. Procedures for method used to remove IPO-related NSWS component.**
